# Supplementary material for: Application of hierarchical TiO2 spheres as scattering layer for enhanced photovoltaic performance in dye sensitized solar cell
Source: Royal Society of Chemistry journal article supplement (doi:10.1039/c3ce27098j), 2013-01-01
Supplement: c3ce27098j.pdf [file c3ce27098j.pdf]

## Application of hierarchical TiO<sub>2</sub> spheres as scattering layer for enhanced photovoltaic performance in dye sensitized solar cell

Zhiyong Gao<sup>a</sup>, Zhuangli Wu<sup>a</sup>, Xiaomin Li<sup>a</sup>, Jiuli Chang<sup>a,b</sup>, Dapeng Wu<sup>a,b</sup>, Pengfei Ma<sup>c</sup>, Fang Xu<sup>a</sup>, Shuyan Gao<sup>a</sup>, Kai Jiang<sup>a,c\*</sup>

<sup>a</sup> College of Chemistry and Chemical Engineering, Henan Normal University, Henan Xinxiang 453007, PR China

<sup>b</sup> Collaborative innovation center of motive power & key materials, Henan, 453007, PR China

<sup>c</sup> Key Laboratory of Photovoltaic Materials of Henan Province, Henan Xinxiang, 453007, PR China

Corresponding author:

Email: [jiangkai6898@126.com](mailto:jiangkai6898@126.com) (K. Jiang), Tel/fax: +86 373 3326209

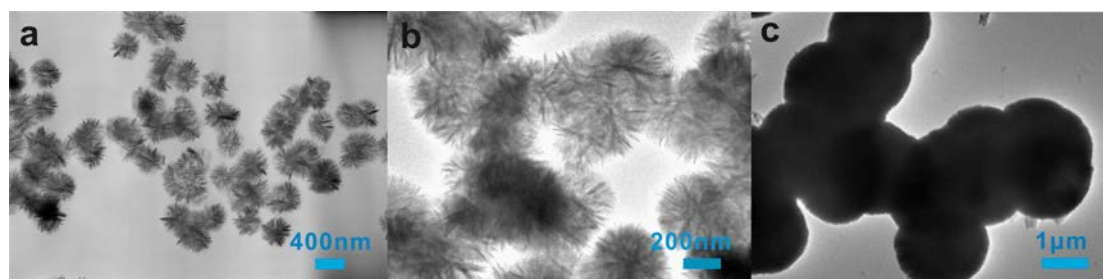

**Fig. S1** TEM of a) H1, b) H2 c) H5.

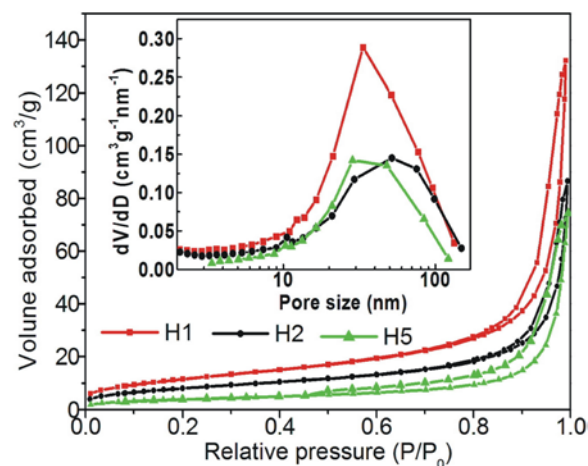

**Fig. S2** N<sub>2</sub> sorption isotherms and corresponding BJH pore size distributions of H1, H2 and H5 after calcination at 450 °C for 2 h.

**Table S1** Surface parameters of calcinated H1, H2 and H5.

| Products | BET surface area (m <sup>2</sup> /g) | Pore size (cm <sup>3</sup> /g) | Pore size (nm) |
|----------|--------------------------------------|--------------------------------|----------------|
| H1       | 42.71                                | 0.20                           | 33.42          |
| H2       | 29.84                                | 0.13                           | 51.75          |
| H5       | 14.23                                | 0.11                           | 28.48          |

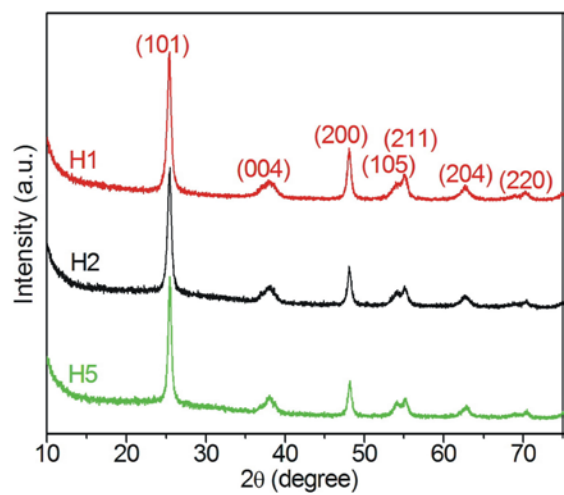

**Fig. S3** XRD of calcinated H1, H2 and H5.
